# Supplementary material
Source: publisher site journal article supplement (https://www.oncotarget.com/article/28290)
Supplement: Supplementary file 1 [file 28290]

## Addendum

**Addendum: Acquired-resistance of bevacizumab treatment for radiation brain necrosis: a case report****Hongqing Zhuang<sup>1,\*</sup>, Xiangkun Yuan<sup>2,\*</sup>, Dayong Sun<sup>3</sup>, Jianliang Bian<sup>4</sup>, Joe Y. Chang<sup>5</sup>, Zhiyong Yuan<sup>1</sup> and Ping Wang<sup>1</sup>**

<sup>1</sup>Department of Radiotherapy, Tianjin Medical University Cancer Institute and Hospital, National Clinical Research Center for Cancer, Tianjin Key Laboratory of Cancer Prevention and Therapy, Tianjin, China

<sup>2</sup>Department of Radiotherapy, Hebei Province Cangzhou Hospital of Integrated Traditional and Western Medicine, Hebei, China

<sup>3</sup>Department of Chemo-Radiotherapy, Chengde Center Hospital, Second Clinical Medical School of Chengde Medical University, Hebei, China

<sup>4</sup>Department of Radiotherapy, Affiliated Hospital of Hebei University, Hebei, China

<sup>5</sup>Department of Radiation Oncology, Division of Radiation Oncology, The University of Texas, MD Anderson Cancer Center, Houston, TX, USA

\*These authors have contributed equally to this work

**Published:**

**Copyright:** © 2023 Zhuang et al. This is an open access article distributed under the terms of the [Creative Commons Attribution License](#) (CC BY 3.0), which permits unrestricted use, distribution, and reproduction in any medium, provided the original author and source are credited.

**This article has an addendum:** Patient consent was required and obtained.

Original article: Oncotarget. 2016; 7:13265–13268. <https://doi.org/10.18632/oncotarget.7724>
